# Supplementary material
Source: HighWire-hosted journal article supplement (https://jnm.snmjournals.org/highwire/filestream/94920/field_highwire_adjunct_files/0/171678_Supplemental_Data.pdf)
Supplement: 171678_Supplemental_Data.pdf [file 171678_Supplemental_Data.pdf]

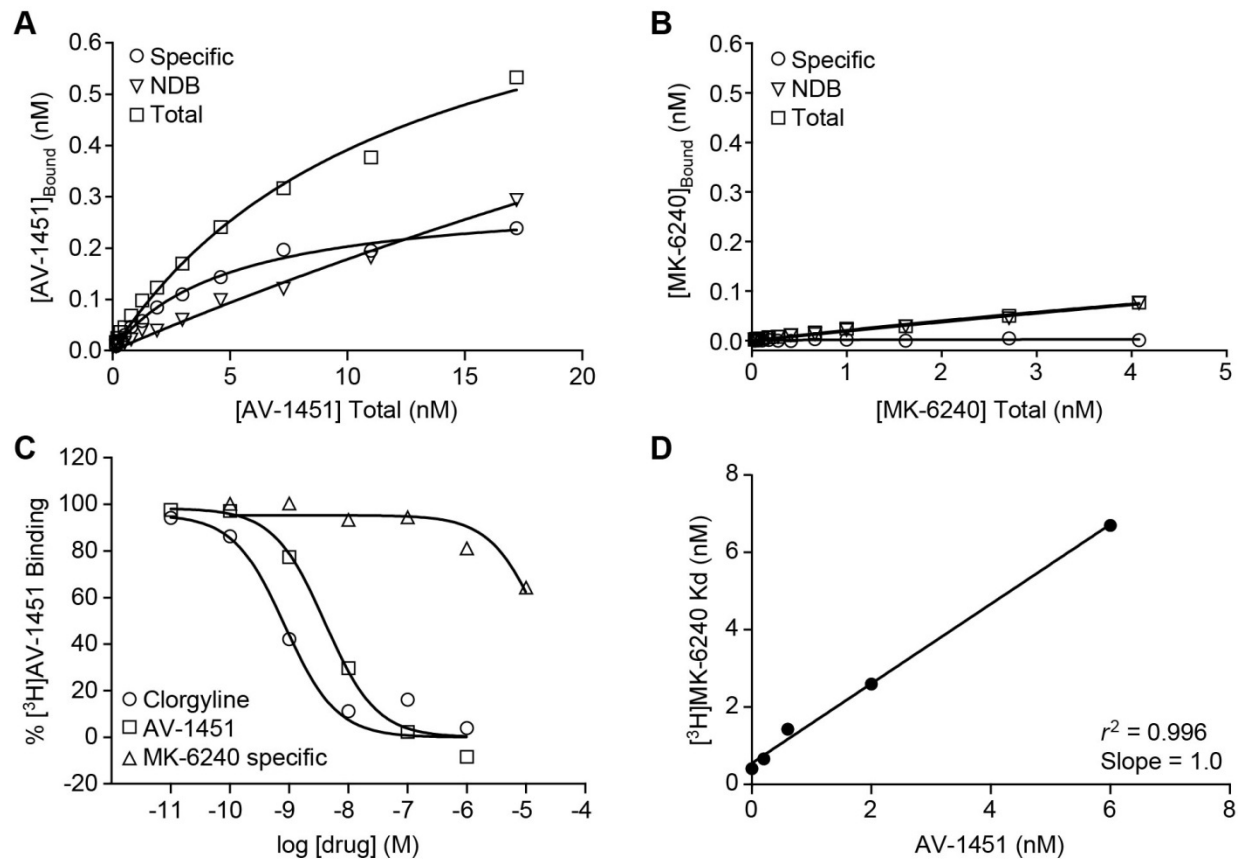

**SUPPLEMENTAL FIGURE 1.** Total, specific, and non-displaceable binding (NDB) from saturation binding studies with <sup>3</sup>H-AV-1451 (A) and <sup>3</sup>H-MK-6240 (B) in non-AD brain frontal cortex (donor 294). NDB was defined by self-block at 100x  $K_d$  concentration. (C) Displacement of <sup>3</sup>H-AV-1451 binding by MAO-A inhibitor clorgyline (circle) AV-1451 (square) and MK-6240 (triangle) in non-AD brain. (D) Linear relationship between apparent  $K_d$  observed for <sup>3</sup>H-MK-6240 and increasing concentrations of AV-1451 (saturation binding studies in NFT-rich AD cortex) indicating direct competition for the same binding site.
